# Supplementary material
Source: PubMed Central journal article supplement (PMC9254038)

## **SUPPLEMENTAL MATERIALS**

**Predicting cerebral infarction in patients with atrial fibrillation**

**using machine learning: the Fushimi AF study**

Table I. Hyperparameters of the machine learning model

| Algorithm | Hyperparameter      | Searched value or category                                                                                                   |
|-----------|---------------------|------------------------------------------------------------------------------------------------------------------------------|
| CatBoost  | Tree depth          | 2, 3, 4, 5, 6, 7, 8, 9, 10, 11, 12, 13, 14, 15                                                                               |
|           | Random strength     | 1e-9, 1e-8, 1e-7, 1e-6, 1e-5, 1e-4, 1e-3, 1e-2, 1e-1, 1, 10                                                                  |
|           | Bagging temperature | 0.0, 0.1, 0.2, 0.3, 0.4, 0.5, 0.6, 0.7, 0.8, 0.9, 1.0                                                                        |
|           | Border count        | 1–255                                                                                                                        |
|           | Scale pos weight    | 0.01, 0.05, 0.10, 0.15, 0.20, 0.25, 0.30, 0.35, 0.40, 0.45, 0.50, 0.55, 0.60, 0.65, 0.70, 0.75, 0.80, 0.85, 0.90, 0.95, 1.00 |
|           | Iterations          | 100, 200, 300, 400, 500, 600, 700, 800, 900, 1000                                                                            |

Table II. The baseline variables after data preprocessing and its missing data

| Variables (n=68)                                                  | Number of missing data | % of missing data |
|-------------------------------------------------------------------|------------------------|-------------------|
| Age                                                               | 0                      | 0.0               |
| Sex                                                               | 0                      | 0.0               |
| Hight                                                             | 84                     | 8.4               |
| Weight                                                            | 56                     | 5.6               |
| Body mass index                                                   | 90                     | 9.0               |
| Body surface area                                                 | 90                     | 9.0               |
| Systolic blood pressure                                           | 3                      | 3.0               |
| Diastolic blood pressure                                          | 3                      | 3.0               |
| Pulse rate                                                        | 2                      | 0.2               |
| Baseline cardiac rhythm on electrocardiogram                      | 0                      | 0.0               |
| Type of atrial fibrillation                                       | 0                      | 0.0               |
| Palpitation                                                       | 0                      | 0.0               |
| Shortness of breath                                               | 0                      | 0.0               |
| Fatigue                                                           | 0                      | 0.0               |
| Chest pain                                                        | 15                     | 1.5               |
| Dizziness                                                         | 15                     | 1.5               |
| Previous stroke (cerebral infarction / transient ischemic attack) | 0                      | 0.0               |
| Previous intracranial hemorrhage                                  | 0                      | 0.0               |
| Previous systemic thromboembolism                                 | 0                      | 0.0               |
| Location of systemic thromboembolism                              | 0                      | 0.0               |
| Previous major bleeding                                           | 0                      | 0.0               |
| Congestive heart failure                                          | 0                      | 0.0               |
| The New York Heart                                                | 0                      | 0.0               |

|                                             |   |     |
|---------------------------------------------|---|-----|
| Association functional classification       |   |     |
| Mitral regurgitation                        | 0 | 0.0 |
| Atrial regurgitation                        | 0 | 0.0 |
| Mitral valve stenosis                       | 0 | 0.0 |
| Atrial valve stenosis                       | 0 | 0.0 |
| Mitral valve prolapse                       | 0 | 0.0 |
| Surgical history of valvular heart disease  | 0 | 0.0 |
| Hypertrophic cardiomyopathy                 | 0 | 0.0 |
| Dilated cardiomyopathy                      | 0 | 0.0 |
| Hypertension                                | 0 | 0.0 |
| Diabetes mellitus                           | 0 | 0.0 |
| Dyslipidemia                                | 0 | 0.0 |
| Coronary artery disease                     | 0 | 0.0 |
| Previous myocardial infarction              | 0 | 0.0 |
| Previous percutaneous coronary intervention | 0 | 0.0 |
| Previous coronary artery bypass grafting    | 0 | 0.0 |
| Peripheral artery disease                   | 0 | 0.0 |
| Chronic kidney disease                      | 0 | 0.0 |
| Hemodialysis                                | 0 | 0.0 |
| Chronic obstructive pulmonary disease       | 0 | 0.0 |
| Pacemaker implantation                      | 0 | 0.0 |
| Implantable cardioverter defibrillator      | 0 | 0.0 |
| Cardiac resynchronization therapy           | 0 | 0.0 |
| History of cardiac ablation                 | 0 | 0.0 |
| History of direct cardioversion             | 0 | 0.0 |

|                                      |     |      |
|--------------------------------------|-----|------|
| Smoking history                      | 259 | 25.8 |
| Intake of warfarin                   | 0   | 0.0  |
| Intake of direct oral anticoagulant  | 0   | 0.0  |
| Intake of antiplatelet drug          | 0   | 0.0  |
| Intake of antiarrhythmic drug        | 0   | 0.0  |
| Creatine phosphokinase               | 235 | 23.4 |
| Creatinine                           | 40  | 4.0  |
| Blood urea nitrogen                  | 56  | 5.6  |
| Creatinine clearance                 | 92  | 9.2  |
| Triglyceride                         | 160 | 15.9 |
| High-density lipoprotein cholesterol | 264 | 26.3 |
| Low-density lipoprotein cholesterol  | 258 | 25.7 |
| Blood sugar                          | 114 | 11.3 |
| Cardio-thoracic ratio on chest X-ray | 124 | 12.3 |
| Ejection fraction                    | 215 | 21.4 |
| Left atrial dimension                | 222 | 22.1 |
| Relative wall thickness              | 226 | 22.5 |
| Left ventricular mass                | 226 | 22.5 |
| Left ventricular mass index          | 273 | 27.2 |
| Wall motion asynergy                 | 199 | 19.8 |

Figure I. the important variables for each algorithm in the variable selection step

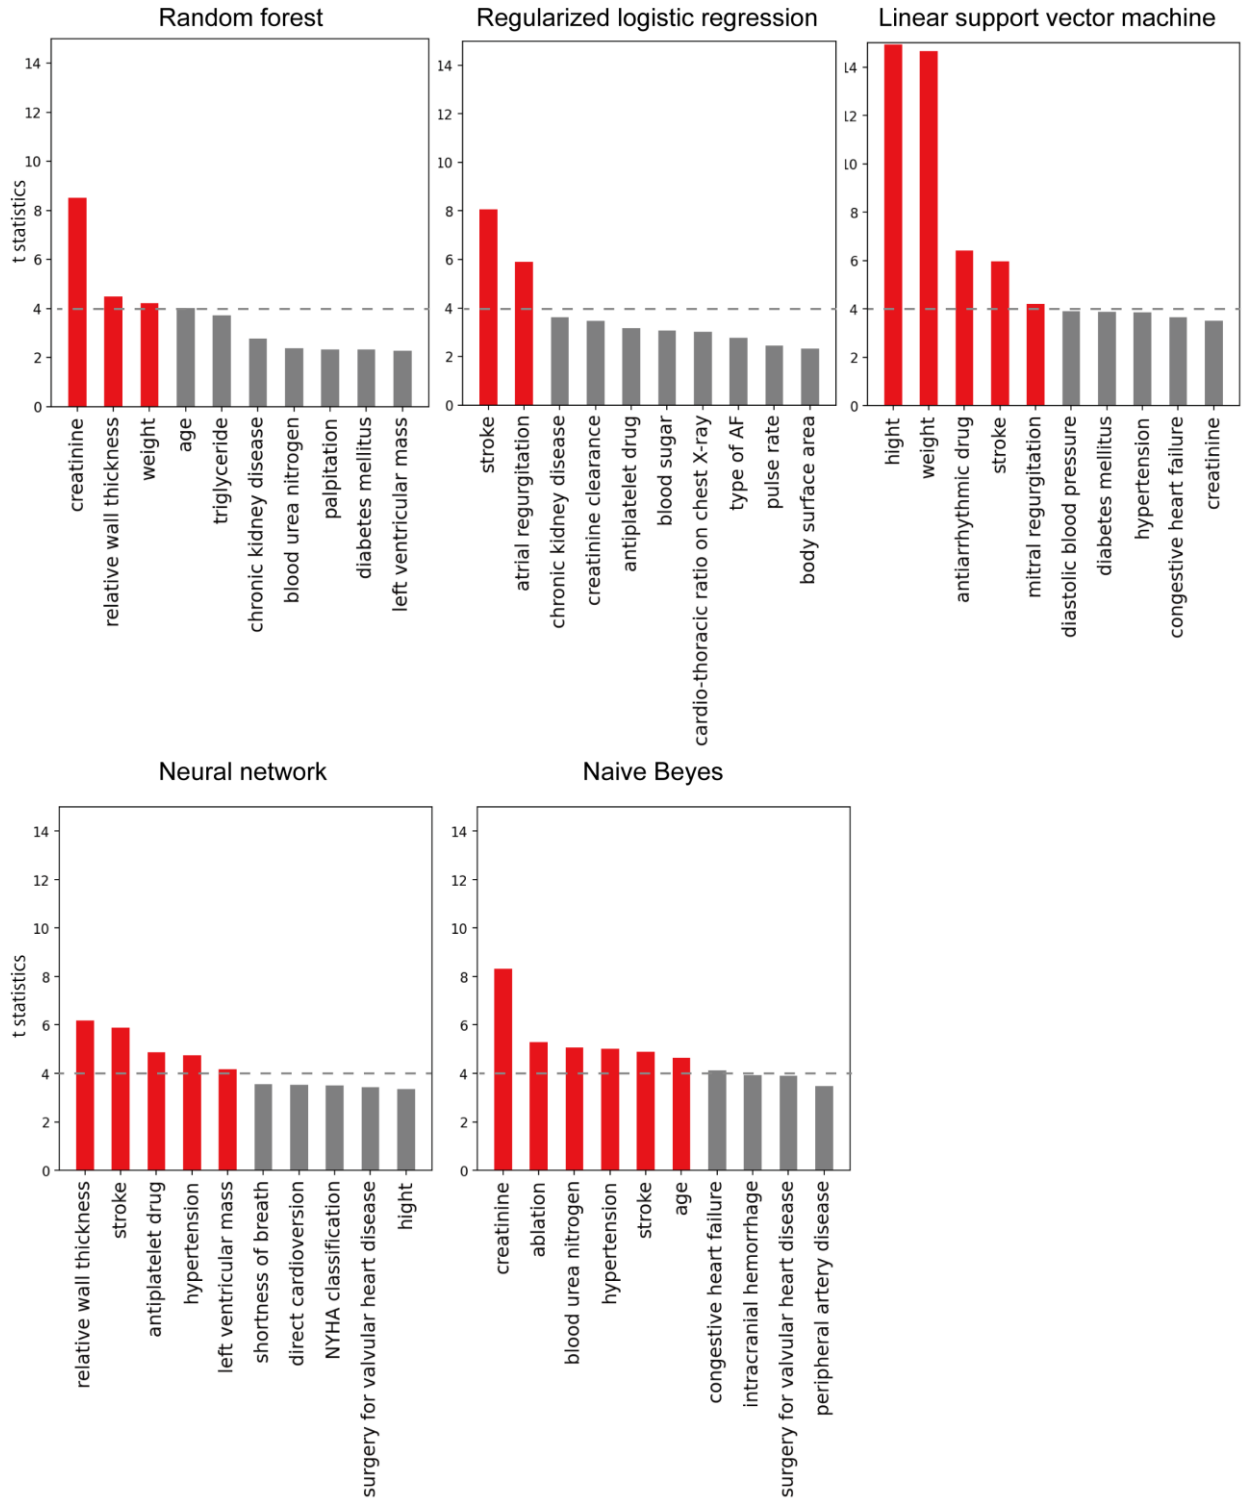

Supplement: sj-pdf-1-jcb-10.1177_0271678X211063802.pdf [file sj-pdf-1-jcb-10.1177_0271678X211063802.pdf]
